# Supplementary material for: Deciphering Novel SARS CoV-2 specific Disease Pathways from RNA Sequencing Data of COVID-19 Infected A549 Cells and Potential Therapeutics using Next Generation Knowledge Discovery Platforms
Source: Research Square preprint supplement (doi:10.21203/rs.3.rs-589902/v1), 2021-06-22
Supplement: Supplementary file 1 [file dfd0ab755e5666baeb3034a8.docx]

* Please provide your Structured Abstract and placed it after the Authors information.

Abstract
The Abstract should not exceed 350 words. Please minimize the use of abbreviations and do not cite references in the abstract. The abstract must include the following separate sections:

Background: the context and purpose of the study
Methods: how the study was performed and statistical tests used
Results: the main findings
Conclusions: brief summary and potential implications

**Set the abstract as per requirement on structural basis**

2.** Please provide your Conclusion section and placed it after the Discussion Section.
Conclusions
This should state clearly the main conclusions and provide an explanation of the importance and relevance of the study reported.

**Conclusion section mentioned after the discussion section**
3.Please provide your Abbreviation and placed it after the Conclusion section

> *List of abbreviations
If abbreviations are used in the text they should be defined in the text at first use, and a list of abbreviations should be provided.

**List of abbreviations are mentioned after the conclusion section**

4.* Please provide your Declaration section and placed it after the abbreviation section.
> *Declarations
All manuscripts must contain the following sections under the heading 'Declarations':

-Ethics approval and consent to participate
Manuscripts reporting studies involving human participants, human data or human tissue must:

**N/A because in this study no human and animal blood sample were involved**

*include a statement on ethics approval and consent (even where the need for approval was waived)
*include the name of the ethics committee that approved the study and the committee’s reference number if appropriate
Studies involving animals must include a statement on ethics approval.
If your manuscript does not report on or involve the use of any animal or human data or tissue, please state “Not applicable” in this section.

**Not applicable**


-Consent to publication
If your manuscript contains any individual person’s data in any form (including individual details, images or videos), consent for publication must be obtained from that person, or in the case of children, their parent or legal guardian. All presentations of case reports must have consent for publication.
**Not applicable**
- Availability of data and material
For all journals, authors must include an “Availability of data and materials” section in their article detailing their where the data supporting findings can be found. If you do not wish to share your data, please state that data will not be shared, and state the reason.

**Not applicable**


- Competing interests
All financial and non-financial competing interests must be declared in this section.

- Funding
All sources of funding for the research reported should be declared. The role of the funding body in the design of the study and collection, analysis, and interpretation of data and in writing the manuscript should be declared.

**Already mentioned**

- Authors' contributions
The individual contributions of authors to the manuscript should be specified in this section.

- Acknowledgements
Please acknowledge anyone who contributed towards the article who does not meet the criteria for authorship including anyone who provided professional writing services or materials.
If any of the sections are not relevant to your manuscript, please include the heading and write 'Not applicable' for that section.

**Already mentioned**

All subsections should be present, and if any sections are not relevant to your manuscript please state “Not applicable” beneath the subheading for the appropriate section. Please contact the Editorial Office if you are unsure of the required contents for any of the subsections within the Declarations.
